# Supplementary material for: Moringa oleifera Leaf Supplementation as a Glycemic Control Strategy in Subjects with Prediabetes
Source: MDPI journal article supplement (doi:10.3390/nu14010057), 2021-12-24
Supplement: s1 [file s1]

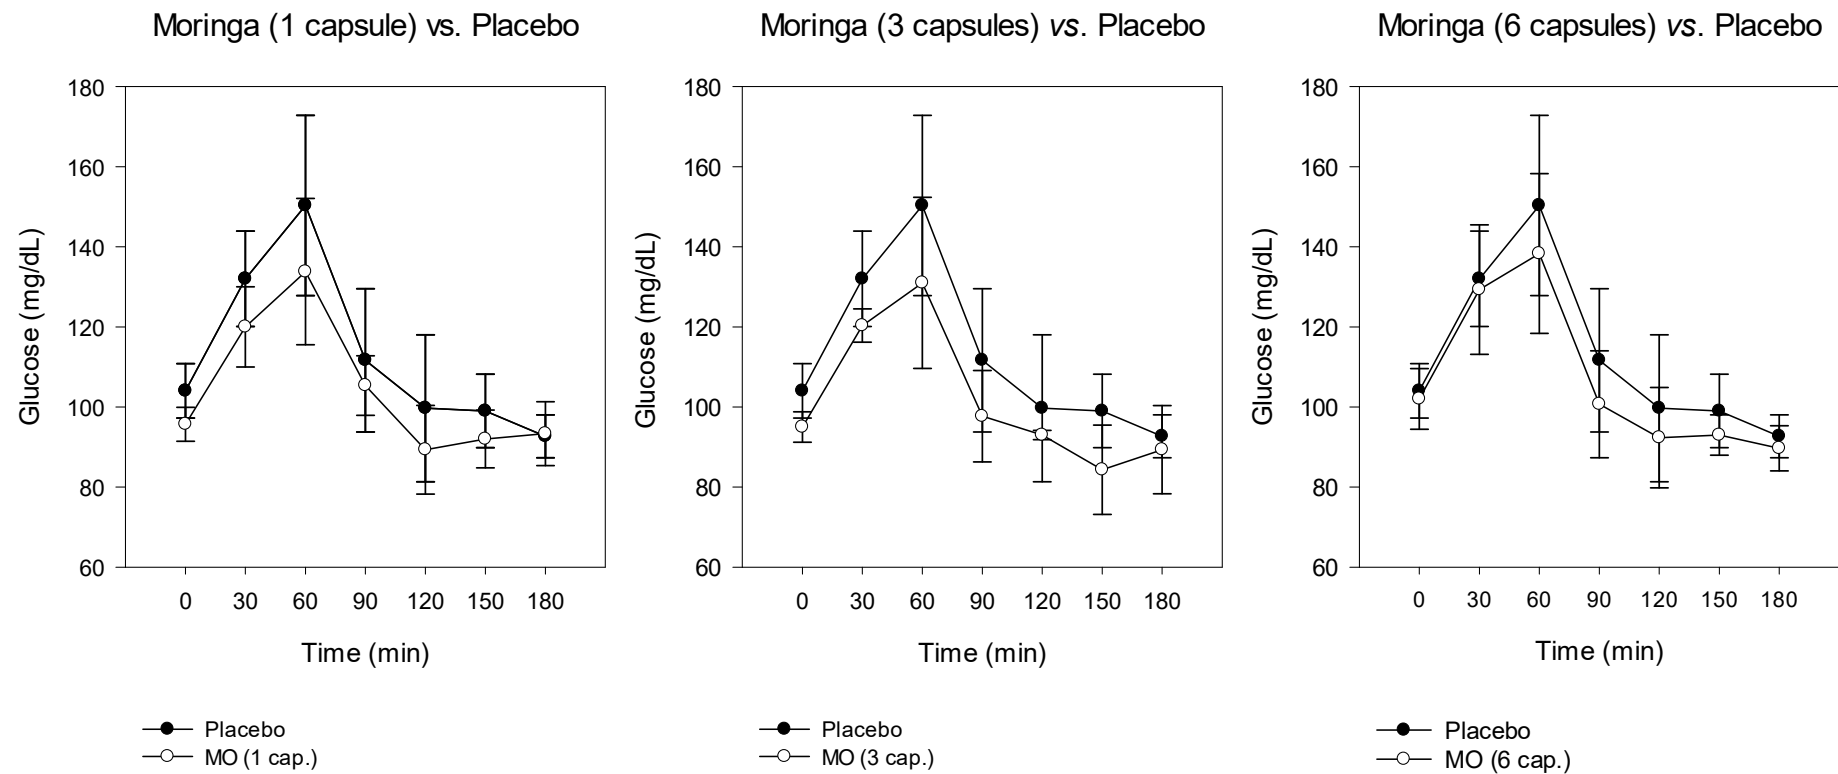

**Figure S1.** Postprandial glucose of three participants with prediabetes in the dose study. AUC was calculated with the trapezoidal rule and compared with that of the PLC group using Mann-Whitney U test. Non-significant trends ( $P \approx 0.1$ ) were obtained with the doses of 1 and 6 capsules.

**Table S1.** Nutrient and polyphenol content in the MO dry leaf powder.

| NUTRITIONAL ANALYSIS    |       |
|-------------------------|-------|
| Energy (kcal/100 g)     | 350   |
| Energy (kj/100 g)       | 1465  |
| Fat (%)                 | 4.66  |
| Of which: saturated (%) | 0.70  |
| Carbohydrates (%)       | 49.27 |
| Of which: sugars (%)    | 0.05  |
| Proteins (%)            | 27.78 |
| Salt (%)                | 0.71  |
| CHEMICAL ANALYSIS       |       |
| Calcium (mg/100g)       | 4854  |
| Potassium (mg/100g)     | 2761  |
| Magnesium (mg/100g)     | 543   |
| Sodium (mg/100g)        | 541   |
| Phosphorus (mg/100g)    | 46    |
| Iron (mg/100g)          | 21    |
| Zinc (mg/100g)          | 8     |
| Manganese (mg/100g)     | 5     |
| Total polyphenols (ppm) | 2300  |

**Table S2.** Primers used in qPCR gut microbiota analysis.

| Bacteria                    | Primer                  | Sequence (5'→3')          | Size<br>(pb) | Reference |
|-----------------------------|-------------------------|---------------------------|--------------|-----------|
| <i>Blautia coccooides-</i>  | gCcoc-F                 | AAATGACGGTACCTGACTAA      | 440          | [1]       |
| <i>Eubacterium rectale</i>  | gCcoc-R                 | CTTTGAGTTTCATTCTTGCGAA    |              |           |
| <i>Bacteroides fragilis</i> | Bfra-F                  | ATAGCCTTTCGAAAGRAAGAT     | 495          | [1]       |
| group                       | Bfra-R                  | CCAGTATCAACTGCAATTTTA     |              |           |
| <i>Clostridium</i> cluster  | sg-Clept-F              | GCACAAGCAGTGGAGT          | 239          | [1]       |
| IV                          | sg-Clept-R3             | CTTCCTCCGTTTTGTCAA        |              |           |
| <i>Bifidobacterium spp.</i> | BifF                    | TCGCGTC(C/T)GGTGTGAAAG    | 243          | [2]       |
|                             | BifR                    | CCACATCCAGC(A/G)TCCAC     |              |           |
| <i>Enterobacteriaceae</i>   | Eco1457F                | CATTGACGTTACCCGCAGAAGAAGC | 195          | [3]       |
|                             | Eco1652R                | CTCTACGAGACTCAAGCTTGC     |              |           |
| <i>Enterococcus spp.</i>    | Enteroc_F               | CCCTTATTGTTAGTTGCCATCATT  | 123          | [2]       |
|                             | Enteroc_R               | ACTCGTTGTACTTCCCATTGT     |              |           |
| <i>Lactobacillus</i> group  | Lacto_F                 | AGCAGTAGGGAATCTTCCA       | 200          | [4,5]     |
|                             | Lacto_R                 | CACCGCTACACATGGAG         |              |           |
| <i>Faecalibacterium</i>     | Fprau223-F              | GATGGCCTCGCGTCCGATTAG     | 199          | [3]       |
| <i>praustrnizzi</i>         | Fprau420-R              | CCGAAGACCTTCTTCCTCC       |              |           |
| <i>Akkermansia</i>          | F:S-St-Muc-1437-a-      | CCTTGCGGTTGGCTTCAGAT      | 327          | [6]       |
| <i>muciniphila</i>          | A-20                    | CAGCACGTGAAGGTGGGGAC      |              |           |
|                             | R: S-St-Muc-1129-a-a-20 |                           |              |           |

**Table S3.** Anthropometrical values at basal and end-of-intervention time points.

|                         | PLC       |           |                       |                         | MO        |           |                       |
|-------------------------|-----------|-----------|-----------------------|-------------------------|-----------|-----------|-----------------------|
|                         | 0wk       | 12wk      | <i>p</i> <sup>#</sup> |                         | 0wk       | 12wk      | <i>p</i> <sup>#</sup> |
| Weight ( <i>n</i> = 31) | 78.2±12.2 | 78.5±12.1 | 0.465                 | Weight ( <i>n</i> = 29) | 80.1±14.1 | 79.6±13.3 | 0.319                 |
| BMI ( <i>n</i> = 31)    | 28.4±3.8  | 28.5±3.7  | 0.436                 | BMI ( <i>n</i> = 29)    | 29.7±3.9  | 29.5±3.9  | 0.328                 |
| WC                      |           |           |                       | WC                      |           |           |                       |
| Male ( <i>n</i> = 10)   | 92.1±8.2  | 91.0±7.7  | 0.263                 | Male ( <i>n</i> = 6)    | 96.9±6.9  | 96.9±7.6  | 0.916                 |
| Female ( <i>n</i> = 16) | 92.0±11.7 | 92.7±11.0 | 0.479                 | Female ( <i>n</i> = 13) | 92.3±7.3  | 90.7±8.5  | 0.136                 |

Mean±SD. <sup>#</sup>Paired T test for weight and BMI comparison and Wilcoxon Signed Rank test for WC. <sup>1</sup>WC, waist circumference. WC missing values are due to distancing security measures during the covid-19 pandemic in subjects finishing the study during lockdown.

**Table S4.** Energy and nutrient intakes at the three study visits in each group.

|                   |     | 0wk        | 6wk        | 12wk       | <i>P</i> <sup>#</sup>                   |
|-------------------|-----|------------|------------|------------|-----------------------------------------|
| Calories (Kcal)   | PLC | 1888±562   | 1905±394   | 1966±433   | NS                                      |
|                   | MO  | 1893±497   | 1997±448   | 1978±542   |                                         |
| Protein (g)       | PLC | 80.2±21.0  | 86.4±22.8  | 87.6±20.2  | <i>P</i> <sub>visit</sub> = 0.007       |
|                   | MO  | 80.6±22.9  | 88.5±17.3  | 88.4±23.6  |                                         |
| Protein (%)       | PLC | 17.32±3.00 | 18.22±3.68 | 18.03±3.03 | NS ( <i>P</i> <sub>visit</sub> = 0.078) |
|                   | MO  | 17.10±2.89 | 18.16±3.54 | 18.10±3.20 |                                         |
| Carbohydrates (g) | PLC | 161.4±54.7 | 157.2±44.0 | 167.2±43.0 | NS                                      |
|                   | MO  | 161.8±45.0 | 172.7±52.4 | 157.1±46.2 |                                         |
| Carbohydrates (%) | PLC | 34.63±6.52 | 33.27±7.51 | 34.38±6.40 | NS                                      |
|                   | MO  | 34.47±6.00 | 34.31±6.00 | 34.30±6.43 |                                         |
| Lipids (g)        | PLC | 91.0±33.5  | 90.4±23.3  | 91.9±26.1  | NS                                      |
|                   | MO  | 91.7±27.3  | 92.2±22.8  | 94.3±31.3  |                                         |
| Lipids (%)        | PLC | 42.67±7.55 | 42.61±6.51 | 41.86±5.82 | NS                                      |
|                   | MO  | 43.61±5.72 | 41.97±7.05 | 42.62±7.41 |                                         |
| AGS (g)           | PLC | 26.2±11.4  | 27.7±8.8   | 27.9±9.1   | NS                                      |
|                   | MO  | 27.7±10.7  | 27.0±7.5   | 27.7±11.4  |                                         |
| AGS (%)           | PLC | 12.20±2.89 | 13.20±3.69 | 12.62±2.40 | NS                                      |
|                   | MO  | 13.00±2.66 | 12.20±2.39 | 12.35±2.99 |                                         |
| AGM (g)           | PLC | 42.6±16.9  | 42.11±12.0 | 42.2±13.6  | NS                                      |
|                   | MO  | 42.2±12.0  | 42.9±12.3  | 43.9±13.9  |                                         |
| AGM (%)           | PLC | 19.95±4.42 | 19.78±3.45 | 19.28±4.17 | NS                                      |
|                   | MO  | 20.27±3.61 | 19.66±4.79 | 20.06±4.03 |                                         |
| AGP (g)           | PLC | 13.1±6.0   | 12.3±5.1   | 12.5±5.4   | NS                                      |
|                   | MO  | 13.5±6.3   | 13.5±5.5   | 14.1±6.5   |                                         |

|                  |     |           |           |           |    |
|------------------|-----|-----------|-----------|-----------|----|
| AGP (%)          | PLC | 6.18±2.32 | 5.75±1.90 | 5.73±2.20 | NS |
|                  | MO  | 6.42±2.58 | 6.13±2.02 | 6.30±2.21 |    |
| Cholesterol (mg) | PLC | 298±110   | 353±142   | 355±105   | NS |
|                  | MO  | 331±122   | 326±101   | 331±129   |    |
| Fiber (g)        | PLC | 22.6±8.0  | 21.6±6.9  | 19.5±5.7  | NS |
|                  | MO  | 20.0±4.9  | 22.1±8.1  | 19.8±6.1  |    |

Data presented are Mean±SD. GLM with the within-subjects factor “visit”, the between-subjects factor “treatment” and the interaction “treatment\*visit”. *p*\*, significant effect as indicated in the subscript.

## References

1. Matsuki, T.; Watanabe, K.; Fujimoto, J.; Takada, T.; Tanaka, R. Use of 16S rRNA gene-targeted group-specific primers for real-time PCR analysis. of predominant bacteria in human feces. *Appl. Environ. Microbiol.* **2004**, *70*, 7220–7228. <https://doi.org/10.1128/AEM.70.12.7220-7228.2004>.
2. Rinttilä, T.; Kassinen, A.; Malinen, E.; Krogus, L.; Palva, A. Development of an extensive set of 16S rDNA-targeted primers for quantification of pathogenic and indigenous bacteria in faecal samples by real-time PCR. *J. Appl. Microbiol.* **2004**, *97*, 1166–1177. <https://doi.org/10.1111/j.1365-2672.2004.02409.x>.
3. Bartosch, S.; Fite, A.; Macfarlane, G.; McMurdo, M.E. Characterization of Bacterial Communities in Feces from Healthy Elderly Volunteers and Hospitalized Elderly Patients by Using Real-Time PCR and Effects of Antibiotic Treatment on the Fecal Microbiota. *Appl. Environ. Microbiol.* **2004**, *70*, 3575–3581. <https://doi.org/10.1128/AEM.70.6.3575-3581.2004>.
4. Heilig, H.G.; Zoetendal, E.G.; Vaughan, E.E.; Marteau, P.; Akkermans, A.D.; de Vos, W.M. Molecular diversity of *Lactobacillus* spp. and other lactic acid bacteria in the human intestine as determined by specific amplification of 16S ribosomal DNA. *Appl. Environ. Microbiol.* **2002**, *68*, 114–123. <https://doi.org/10.1128/AEM.68.1.114-123.2002>.
5. Walter, J.; Hertel, C.; Tannock, G.W.; Lis, C.M.; Munro, K.; Hammes, W.P. Detection of *Lactobacillus*, *Pediococcus*, *Leuconostoc*, and *Weissella* species in human feces by using group-specific PCR primers and denaturing gradient gel electrophoresis. *Appl. Environ. Microbiol.* **2001**, *67*, 2578–2585. <https://doi.org/10.1128/AEM.67.6.2578-2585.2001>.
6. Derrien, M. Mucin Utilisation and Host Interactions of the Novel Intestinal Microbe *Akkermansia muciniphila*. Ph.D. Thesis, Wageningen University, Wageningen, The Netherlands; With Summary in Dutch and French 2007. ISBN 978-90-8504-644-8.
